# Supplementary material
Source: publisher figshare collection journal article supplement (https://acs.figshare.com/ndownloader/files/5336482)
Supplement: Supplementary file 1 [file 5336482]

data_global
_publ_requested_coeditor_name ?
_publ_contact_letter
;
Dear Sir or Madam:

Please consider this CIF as a supplmentary data for a paper submitted to
Inorg. Chem.
Thanks.

Shao-hua Gou
;
#=================================================================

# 2. PROCESSING SUMMARY (IUCr Office Use Only)

_journal_date_recd_electronic     ?

_journal_date_to_coeditor         ?
_journal_date_from_coeditor       ?
_journal_date_accepted            ?

_journal_date_printers_first      ?
_journal_date_printers_final      ?
_journal_date_proofs_out          ?
_journal_date_proofs_in           ?

_journal_coeditor_name            ?
_journal_coeditor_code            ?
_journal_coeditor_notes
 ?

_journal_techeditor_code          ?
_journal_techeditor_notes
 ?

_journal_coden_ASTM               ?
_journal_name_full                ?
_journal_year                     ?
_journal_volume                   ?
_journal_issue                    ?
_journal_page_first               ?
_journal_page_last                ?

_journal_suppl_publ_number        ?
_journal_suppl_publ_pages         ?

#=======================================================

# 3. TITLE AND AUTHOR LIST

_publ_section_title
;
Chemical key-modulated reversible conversion of molecular assembly 
between a macrocycle and a linear chain
;
loop_
 _publ_author_name
 _publ_author_address
      'Hua-ze Dong'
;     State Key Laboratory of Coordination Chemistry
      Nanjing University
      Nanjing, Jiangsu 210093
      P. R. China
;
      'Juan Yang'
;     State Key Laboratory of Coordination Chemistry
      Nanjing University
      Nanjing, Jiangsu 210093
      P. R. China
;
      'Gang Xu'
;     State Key Laboratory of Coordination Chemistry
      Nanjing University
      Nanjing, Jiangsu 210093
      P. R. China    
;
     'Shaohua Gou'
;     State Key Laboratory of Coordination Chemistry
      Nanjing University
      Nanjing, Jiangsu 210093
      P. R. China
;

#======================================

 
data_1 
 
_audit_creation_method            SHELXL-97 
_chemical_name_systematic 
; 
 ? 
; 
_chemical_name_common             ? 
_chemical_melting_point           ? 
_chemical_formula_moiety          
'C20 H16 N6 S2 Hg 2(C2 H3 O2)' 
_chemical_formula_sum 
 'C24 H22 Hg N6 O4 S2' 
_chemical_formula_weight         723
 
loop_ 
 _atom_type_symbol 
 _atom_type_description 
 _atom_type_scat_dispersion_real 
 _atom_type_scat_dispersion_imag 
 _atom_type_scat_source 
 'C'  'C'   0.0033   0.0016 
 'International Tables Vol C Tables 4.2.6.8 and 6.1.1.4' 
 'H'  'H'   0.0000   0.0000 
 'International Tables Vol C Tables 4.2.6.8 and 6.1.1.4' 
 'N'  'N'   0.0061   0.0033 
 'International Tables Vol C Tables 4.2.6.8 and 6.1.1.4' 
 'O'  'O'   0.0106   0.0060 
 'International Tables Vol C Tables 4.2.6.8 and 6.1.1.4' 
 'S'  'S'   0.1246   0.1234 
 'International Tables Vol C Tables 4.2.6.8 and 6.1.1.4' 
 'Hg'  'Hg'  -2.3894   9.2266 
 'International Tables Vol C Tables 4.2.6.8 and 6.1.1.4' 
 
_symmetry_cell_setting             monoclinic
_symmetry_space_group_name_H-M    'P 21/c' 
_symmetry_space_group_name_Hall   'P 21ybc'
 
loop_ 
 _symmetry_equiv_pos_as_xyz 
 'x, y, z' 
 '-x, y+1/2, -z+1/2' 
 '-x, -y, -z' 
 'x, -y-1/2, z-1/2' 
 
_cell_length_a                    15.5371(15) 
_cell_length_b                    8.4121(8) 
_cell_length_c                    19.4194(19) 
_cell_angle_alpha                 90.00 
_cell_angle_beta                  91.988(2) 
_cell_angle_gamma                 90.00 
_cell_volume                      2536.6(4) 
_cell_formula_units_Z             4 
_cell_measurement_temperature     291(2) 
_cell_measurement_reflns_used     1957 
_cell_measurement_theta_min       2.436 
_cell_measurement_theta_max       20.793
 
_exptl_crystal_description        block 
_exptl_crystal_colour             colorless 
_exptl_crystal_size_max           0.2 
_exptl_crystal_size_mid           0.1 
_exptl_crystal_size_min           0.08  
_exptl_crystal_density_meas       ? 
_exptl_crystal_density_diffrn     1.894 
_exptl_crystal_density_method     'not measured' 
_exptl_crystal_F_000              1408 
_exptl_absorpt_coefficient_mu     6.276 
_exptl_absorpt_correction_type    multi-scan 
_exptl_absorpt_correction_T_min   0.428 
_exptl_absorpt_correction_T_max   0.605 
_exptl_absorpt_process_details    ? 
 
_exptl_special_details 
; 
 ? 
; 
 
_diffrn_ambient_temperature       291(2) 
_diffrn_radiation_wavelength      0.71073 
_diffrn_radiation_type            MoK\a 
_diffrn_radiation_source          'fine-focus sealed tube' 
_diffrn_radiation_monochromator   graphite 
_diffrn_measurement_device_type   'Bruker CCD area detector' 
_diffrn_measurement_method        ? 
_diffrn_detector_area_resol_mean  ? 
_diffrn_standards_number          ? 
_diffrn_standards_interval_count  ? 
_diffrn_standards_interval_time   ? 
_diffrn_standards_decay_%         ? 
_diffrn_reflns_number             14244 
_diffrn_reflns_av_R_equivalents   0.0667 
_diffrn_reflns_av_sigmaI/netI     0.1104 
_diffrn_reflns_limit_h_min        -10 
_diffrn_reflns_limit_h_max        19 
_diffrn_reflns_limit_k_min        -10 
_diffrn_reflns_limit_k_max        10 
_diffrn_reflns_limit_l_min        -24 
_diffrn_reflns_limit_l_max        23 
_diffrn_reflns_theta_min          2.10 
_diffrn_reflns_theta_max          27.00 
_reflns_number_total              5504 
_reflns_number_gt                 3743 
_reflns_threshold_expression      >2sigma(I) 
 
_computing_data_collection        'SMART (Bruker, 2000)' 
_computing_cell_refinement        'SMART (Bruker, 2000)' 
_computing_data_reduction         'SMART (Bruker, 2000)' 
_computing_structure_solution     'SHELXTL (Bruker, 2000)' 
_computing_structure_refinement   'SHELXTL (Bruker, 2000)' 
_computing_molecular_graphics     'SHELXTL (Bruker, 2000)' 
_computing_publication_material   'SHELXTL (Bruker, 2000)'  
 
_refine_special_details 
; 
 Refinement of F^2^ against ALL reflections.  The weighted R-factor wR and 
 goodness of fit S are based on F^2^, conventional R-factors R are based 
 on F, with F set to zero for negative F^2^. The threshold expression of 
 F^2^ > 2sigma(F^2^) is used only for calculating R-factors(gt) etc. and is 
 not relevant to the choice of reflections for refinement.  R-factors based 
 on F^2^ are statistically about twice as large as those based on F, and R- 
 factors based on ALL data will be even larger. 
; 
 
_refine_ls_structure_factor_coef  Fsqd  
_refine_ls_matrix_type            full 
_refine_ls_weighting_scheme       calc  
_refine_ls_weighting_details 
 'calc w=1/[\s^2^(Fo^2^)+(0.0119P)^2^+0.0000P] where P=(Fo^2^+2Fc^2^)/3' 
_atom_sites_solution_primary      direct 
_atom_sites_solution_secondary    difmap 
_atom_sites_solution_hydrogens    geom 
_refine_ls_hydrogen_treatment     constr
_refine_ls_extinction_method      none 
_refine_ls_extinction_coef        ? 
_refine_ls_number_reflns          5504 
_refine_ls_number_parameters      336 
_refine_ls_number_restraints      0 
_refine_ls_R_factor_all           0.0838 
_refine_ls_R_factor_gt            0.0500 
_refine_ls_wR_factor_ref          0.0778 
_refine_ls_wR_factor_gt           0.0701 
_refine_ls_goodness_of_fit_ref    0.878 
_refine_ls_restrained_S_all       0.878 
_refine_ls_shift/su_max           0.001 
_refine_ls_shift/su_mean          0.000 
 
loop_ 
 _atom_site_label 
 _atom_site_type_symbol 
 _atom_site_fract_x 
 _atom_site_fract_y 
 _atom_site_fract_z 
 _atom_site_U_iso_or_equiv 
 _atom_site_adp_type 
 _atom_site_occupancy 
 _atom_site_symmetry_multiplicity 
 _atom_site_calc_flag 
 _atom_site_refinement_flags 
 _atom_site_disorder_assembly 
 _atom_site_disorder_group 
Hg1 Hg 0.25171(2) 0.53322(4) 0.260111(13) 0.03618(10) Uani 1 1 d . . . 
S1 S 0.35769(12) 0.4934(2) -0.12317(9) 0.0440(6) Uani 1 1 d . . . 
S2 S 0.14320(13) 0.4311(3) -0.10326(9) 0.0471(6) Uani 1 1 d . . . 
N1 N 0.4053(3) 0.3870(7) 0.0031(3) 0.0309(14) Uani 1 1 d . . . 
N2 N 0.4840(4) 0.3064(8) -0.0945(3) 0.0392(17) Uani 1 1 d . . . 
N3 N 0.3611(4) 0.3930(7) 0.2119(3) 0.0316(15) Uani 1 1 d . . . 
N4 N 0.0814(4) 0.3514(7) 0.0169(3) 0.0356(16) Uani 1 1 d . . . 
N5 N 0.0019(4) 0.2750(8) -0.0847(3) 0.0465(18) Uani 1 1 d . . . 
N6 N 0.1289(4) 0.3989(7) 0.2228(3) 0.0325(15) Uani 1 1 d . . . 
O1 O 0.1918(3) 0.5153(6) 0.3737(2) 0.0512(16) Uani 1 1 d . . . 
O2 O 0.3321(3) 0.4907(6) 0.3765(3) 0.0554(16) Uani 1 1 d . . . 
O3 O 0.2475(4) 0.7921(7) 0.2595(3) 0.0717(19) Uani 1 1 d . . . 
O4 O 0.2458(5) 0.7384(8) 0.1516(3) 0.088(2) Uani 1 1 d . . . 
C1 C 0.2615(5) 0.4925(7) 0.4057(4) 0.0317(18) Uani 1 1 d . . . 
C2 C 0.2613(5) 0.4663(9) 0.4814(3) 0.050(2) Uani 1 1 d . . . 
H2A H 0.2486 0.5644 0.5041 0.075 Uiso 1 1 calc R . . 
H2B H 0.3169 0.4288 0.4973 0.075 Uiso 1 1 calc R . . 
H2C H 0.2184 0.3886 0.4918 0.075 Uiso 1 1 calc R . . 
C3 C 0.2456(6) 0.8323(11) 0.1986(5) 0.050(2) Uani 1 1 d . . . 
C4 C 0.2395(7) 1.0071(10) 0.1835(5) 0.092(4) Uani 1 1 d . . . 
H4A H 0.2950 1.0464 0.1715 0.138 Uiso 1 1 calc R . . 
H4B H 0.2205 1.0622 0.2235 0.138 Uiso 1 1 calc R . . 
H4C H 0.1990 1.0245 0.1457 0.138 Uiso 1 1 calc R . . 
C5 C 0.4208(5) 0.3851(9) -0.0634(4) 0.0367(19) Uani 1 1 d . . . 
C6 C 0.5328(5) 0.2173(9) -0.0529(4) 0.041(2) Uani 1 1 d . . . 
H6 H 0.5777 0.1605 -0.0717 0.049 Uiso 1 1 calc R . . 
C7 C 0.5211(5) 0.2039(8) 0.0170(4) 0.0363(19) Uani 1 1 d . . . 
H7 H 0.5551 0.1368 0.0445 0.044 Uiso 1 1 calc R . . 
C8 C 0.4563(5) 0.2947(8) 0.0442(4) 0.0294(18) Uani 1 1 d . . . 
C9 C 0.4400(5) 0.2953(8) 0.1184(3) 0.0319(18) Uani 1 1 d . . . 
C10 C 0.4908(5) 0.2062(9) 0.1647(4) 0.049(2) Uani 1 1 d . . . 
H10 H 0.5347 0.1419 0.1491 0.058 Uiso 1 1 calc R . . 
C11 C 0.4750(5) 0.2149(9) 0.2331(4) 0.051(2) Uani 1 1 d . . . 
H11 H 0.5086 0.1561 0.2645 0.061 Uiso 1 1 calc R . . 
C12 C 0.4115(5) 0.3075(9) 0.2559(4) 0.042(2) Uani 1 1 d . . . 
H12 H 0.4023 0.3127 0.3029 0.051 Uiso 1 1 calc R . . 
C13 C 0.3763(4) 0.3894(8) 0.1451(3) 0.0278(17) Uani 1 1 d . . . 
H13 H 0.3429 0.4524 0.1153 0.033 Uiso 1 1 calc R . . 
C14 C 0.2879(4) 0.6020(8) -0.0697(4) 0.0374(19) Uani 1 1 d . . . 
H14A H 0.3225 0.6510 -0.0330 0.045 Uiso 1 1 calc R . . 
H14B H 0.2617 0.6869 -0.0969 0.045 Uiso 1 1 calc R . . 
C15 C 0.2172(4) 0.5084(8) -0.0376(3) 0.040(2) Uani 1 1 d . . . 
H15A H 0.1863 0.5762 -0.0065 0.048 Uiso 1 1 calc R . . 
H15B H 0.2420 0.4210 -0.0110 0.048 Uiso 1 1 calc R . . 
C16 C 0.0677(5) 0.3421(8) -0.0497(4) 0.0339(19) Uani 1 1 d . . . 
C17 C -0.0554(5) 0.2055(10) -0.0438(4) 0.051(2) Uani 1 1 d . . . 
H17 H -0.1031 0.1558 -0.0646 0.061 Uiso 1 1 calc R . . 
C18 C -0.0476(5) 0.2039(9) 0.0266(4) 0.044(2) Uani 1 1 d . . . 
H18 H -0.0878 0.1534 0.0534 0.053 Uiso 1 1 calc R . . 
C19 C 0.0233(5) 0.2813(9) 0.0559(3) 0.0334(19) Uani 1 1 d . . . 
C20 C 0.0398(5) 0.2955(9) 0.1308(4) 0.0353(19) Uani 1 1 d . . . 
C21 C -0.0159(5) 0.2377(9) 0.1784(4) 0.047(2) Uani 1 1 d . . . 
H21 H -0.0655 0.1846 0.1634 0.056 Uiso 1 1 calc R . . 
C22 C 0.0008(5) 0.2571(9) 0.2474(4) 0.050(2) Uani 1 1 d . . . 
H22 H -0.0367 0.2178 0.2797 0.060 Uiso 1 1 calc R . . 
C23 C 0.0748(5) 0.3366(9) 0.2677(4) 0.041(2) Uani 1 1 d . . . 
H23 H 0.0878 0.3475 0.3146 0.049 Uiso 1 1 calc R . . 
C24 C 0.1103(4) 0.3764(8) 0.1558(3) 0.0320(18) Uani 1 1 d . . . 
H24 H 0.1477 0.4186 0.1242 0.038 Uiso 1 1 calc R . . 
 
loop_ 
 _atom_site_aniso_label 
 _atom_site_aniso_U_11 
 _atom_site_aniso_U_22 
 _atom_site_aniso_U_33 
 _atom_site_aniso_U_23 
 _atom_site_aniso_U_13 
 _atom_site_aniso_U_12 
Hg1 0.03737(19) 0.04251(18) 0.02862(16) -0.00441(15) 0.00085(12) 0.00162(18) 
S1 0.0381(13) 0.0632(16) 0.0307(10) 0.0050(10) 0.0016(8) -0.0009(11) 
S2 0.0379(13) 0.0709(17) 0.0329(11) -0.0026(10) 0.0057(9) -0.0118(11) 
N1 0.027(4) 0.041(4) 0.026(3) 0.003(3) 0.005(3) -0.003(3) 
N2 0.034(4) 0.060(5) 0.024(4) -0.010(3) 0.004(3) -0.001(4) 
N3 0.032(4) 0.033(4) 0.030(4) -0.006(3) 0.001(3) 0.004(3) 
N4 0.035(4) 0.046(4) 0.025(4) -0.003(3) 0.001(3) -0.008(3) 
N5 0.029(4) 0.079(5) 0.031(4) -0.011(3) 0.004(3) -0.009(4) 
N6 0.031(4) 0.044(4) 0.022(3) 0.001(3) -0.003(3) -0.001(3) 
O1 0.047(4) 0.058(4) 0.047(3) -0.005(3) -0.015(3) 0.003(3) 
O2 0.052(4) 0.065(4) 0.051(4) -0.004(3) 0.021(3) 0.001(3) 
O3 0.100(5) 0.056(4) 0.058(4) -0.004(3) -0.008(4) 0.002(4) 
O4 0.126(7) 0.068(5) 0.070(5) -0.005(4) -0.010(4) 0.005(4) 
C1 0.051(6) 0.012(4) 0.032(4) -0.008(3) 0.006(4) -0.003(4) 
C2 0.056(6) 0.054(5) 0.039(5) 0.003(4) 0.001(4) -0.001(5) 
C3 0.050(6) 0.045(6) 0.055(6) -0.002(5) -0.008(5) 0.001(5) 
C4 0.140(11) 0.059(8) 0.074(7) 0.005(5) -0.019(7) -0.004(7) 
C5 0.035(5) 0.041(5) 0.034(5) -0.008(4) -0.001(4) -0.007(4) 
C6 0.035(5) 0.051(6) 0.038(5) -0.014(4) 0.002(4) 0.003(4) 
C7 0.035(5) 0.038(5) 0.036(5) -0.003(4) -0.002(4) 0.001(4) 
C8 0.023(4) 0.025(4) 0.041(5) -0.006(3) 0.003(3) -0.004(4) 
C9 0.028(5) 0.041(5) 0.027(4) 0.002(3) 0.006(3) 0.002(4) 
C10 0.044(6) 0.068(6) 0.035(5) 0.009(4) 0.011(4) 0.024(5) 
C11 0.049(6) 0.065(6) 0.038(5) 0.011(4) 0.002(4) 0.026(5) 
C12 0.050(6) 0.050(6) 0.027(4) 0.010(4) 0.011(4) 0.002(5) 
C13 0.027(4) 0.035(5) 0.022(4) 0.003(3) -0.001(3) 0.001(4) 
C14 0.030(5) 0.036(5) 0.046(5) 0.003(4) -0.005(4) 0.005(4) 
C15 0.036(5) 0.046(6) 0.038(4) 0.003(4) 0.001(3) -0.004(4) 
C16 0.029(5) 0.042(5) 0.032(4) -0.003(4) 0.006(3) 0.000(4) 
C17 0.029(5) 0.075(7) 0.050(6) -0.013(5) -0.001(4) -0.022(5) 
C18 0.034(5) 0.062(6) 0.037(5) -0.004(4) 0.004(4) -0.017(4) 
C19 0.034(5) 0.042(5) 0.025(4) -0.001(3) 0.005(3) -0.002(4) 
C20 0.035(5) 0.042(5) 0.029(4) 0.002(4) 0.003(3) -0.007(4) 
C21 0.032(5) 0.074(7) 0.034(5) 0.003(4) -0.002(4) -0.019(4) 
C22 0.038(5) 0.077(7) 0.035(5) 0.007(4) 0.002(4) -0.024(5) 
C23 0.051(6) 0.051(6) 0.021(4) 0.005(4) 0.003(4) -0.009(5) 
C24 0.027(5) 0.040(5) 0.029(4) 0.001(3) 0.007(3) 0.003(4) 
 
_geom_special_details 
; 
 All esds (except the esd in the dihedral angle between two l.s. planes) 
 are estimated using the full covariance matrix.  The cell esds are taken 
 into account individually in the estimation of esds in distances, angles 
 and torsion angles; correlations between esds in cell parameters are only 
 used when they are defined by crystal symmetry.  An approximate (isotropic) 
 treatment of cell esds is used for estimating esds involving l.s. planes. 
; 
 
loop_ 
 _geom_bond_atom_site_label_1 
 _geom_bond_atom_site_label_2 
 _geom_bond_distance 
 _geom_bond_site_symmetry_2 
 _geom_bond_publ_flag 
Hg1 O3 2.179(6) . ? 
Hg1 N3 2.295(6) . ? 
Hg1 N6 2.313(5) . ? 
Hg1 O1 2.428(5) . ? 
S1 C5 1.749(7) . ? 
S1 C14 1.779(7) . ? 
S2 C16 1.761(7) . ? 
S2 C15 1.808(6) . ? 
N1 C5 1.322(8) . ? 
N1 C8 1.350(8) . ? 
N2 C6 1.323(8) . ? 
N2 C5 1.346(9) . ? 
N3 C13 1.326(7) . ? 
N3 C12 1.348(8) . ? 
N4 C16 1.307(8) . ? 
N4 C19 1.335(8) . ? 
N5 C16 1.333(8) . ? 
N5 C17 1.347(9) . ? 
N6 C24 1.336(7) . ? 
N6 C23 1.340(8) . ? 
O1 C1 1.245(8) . ? 
O2 C1 1.253(8) . ? 
O3 C3 1.230(9) . ? 
O4 C3 1.206(9) . ? 
C1 C2 1.487(9) . ? 
C2 H2A 0.9600 . ? 
C2 H2B 0.9600 . ? 
C2 H2C 0.9600 . ? 
C3 C4 1.502(11) . ? 
C4 H4A 0.9600 . ? 
C4 H4B 0.9600 . ? 
C4 H4C 0.9600 . ? 
C6 C7 1.379(9) . ? 
C6 H6 0.9300 . ? 
C7 C8 1.382(9) . ? 
C7 H7 0.9300 . ? 
C8 C9 1.473(9) . ? 
C9 C13 1.383(9) . ? 
C9 C10 1.393(9) . ? 
C10 C11 1.362(9) . ? 
C10 H10 0.9300 . ? 
C11 C12 1.343(10) . ? 
C11 H11 0.9300 . ? 
C12 H12 0.9300 . ? 
C13 H13 0.9300 . ? 
C14 C15 1.504(9) . ? 
C14 H14A 0.9700 . ? 
C14 H14B 0.9700 . ? 
C15 H15A 0.9700 . ? 
C15 H15B 0.9700 . ? 
C17 C18 1.368(9) . ? 
C17 H17 0.9300 . ? 
C18 C19 1.386(9) . ? 
C18 H18 0.9300 . ? 
C19 C20 1.472(9) . ? 
C20 C24 1.365(9) . ? 
C20 C21 1.376(10) . ? 
C21 C22 1.366(9) . ? 
C21 H21 0.9300 . ? 
C22 C23 1.376(9) . ? 
C22 H22 0.9300 . ? 
C23 H23 0.9300 . ? 
C24 H24 0.9300 . ? 
 
loop_ 
 _geom_angle_atom_site_label_1 
 _geom_angle_atom_site_label_2 
 _geom_angle_atom_site_label_3 
 _geom_angle 
 _geom_angle_site_symmetry_1 
 _geom_angle_site_symmetry_3 
 _geom_angle_publ_flag 
O3 Hg1 N3 122.3(2) . . ? 
O3 Hg1 N6 117.6(2) . . ? 
N3 Hg1 N6 103.61(19) . . ? 
O3 Hg1 O1 93.1(2) . . ? 
N3 Hg1 O1 130.65(19) . . ? 
N6 Hg1 O1 85.20(18) . . ? 
C5 S1 C14 102.7(3) . . ? 
C16 S2 C15 99.0(3) . . ? 
C5 N1 C8 116.6(6) . . ? 
C6 N2 C5 114.6(6) . . ? 
C13 N3 C12 119.2(6) . . ? 
C13 N3 Hg1 124.8(4) . . ? 
C12 N3 Hg1 116.0(5) . . ? 
C16 N4 C19 116.4(6) . . ? 
C16 N5 C17 113.3(6) . . ? 
C24 N6 C23 117.4(6) . . ? 
C24 N6 Hg1 121.5(5) . . ? 
C23 N6 Hg1 121.1(5) . . ? 
C1 O1 Hg1 96.3(5) . . ? 
C3 O3 Hg1 106.2(5) . . ? 
O1 C1 O2 122.3(7) . . ? 
O1 C1 C2 119.1(7) . . ? 
O2 C1 C2 118.5(7) . . ? 
C1 C2 H2A 109.5 . . ? 
C1 C2 H2B 109.5 . . ? 
H2A C2 H2B 109.5 . . ? 
C1 C2 H2C 109.5 . . ? 
H2A C2 H2C 109.5 . . ? 
H2B C2 H2C 109.5 . . ? 
O4 C3 O3 123.1(9) . . ? 
O4 C3 C4 119.7(9) . . ? 
O3 C3 C4 117.2(8) . . ? 
C3 C4 H4A 109.5 . . ? 
C3 C4 H4B 109.5 . . ? 
H4A C4 H4B 109.5 . . ? 
C3 C4 H4C 109.5 . . ? 
H4A C4 H4C 109.5 . . ? 
H4B C4 H4C 109.5 . . ? 
N1 C5 N2 127.2(7) . . ? 
N1 C5 S1 121.7(6) . . ? 
N2 C5 S1 111.1(6) . . ? 
N2 C6 C7 123.7(7) . . ? 
N2 C6 H6 118.1 . . ? 
C7 C6 H6 118.1 . . ? 
C6 C7 C8 117.0(7) . . ? 
C6 C7 H7 121.5 . . ? 
C8 C7 H7 121.5 . . ? 
N1 C8 C7 120.8(7) . . ? 
N1 C8 C9 117.3(6) . . ? 
C7 C8 C9 121.9(7) . . ? 
C13 C9 C10 117.5(7) . . ? 
C13 C9 C8 121.3(6) . . ? 
C10 C9 C8 121.1(7) . . ? 
C11 C10 C9 118.9(7) . . ? 
C11 C10 H10 120.5 . . ? 
C9 C10 H10 120.5 . . ? 
C12 C11 C10 120.7(7) . . ? 
C12 C11 H11 119.6 . . ? 
C10 C11 H11 119.6 . . ? 
C11 C12 N3 121.2(7) . . ? 
C11 C12 H12 119.4 . . ? 
N3 C12 H12 119.4 . . ? 
N3 C13 C9 122.3(6) . . ? 
N3 C13 H13 118.8 . . ? 
C9 C13 H13 118.8 . . ? 
C15 C14 S1 116.2(5) . . ? 
C15 C14 H14A 108.2 . . ? 
S1 C14 H14A 108.2 . . ? 
C15 C14 H14B 108.2 . . ? 
S1 C14 H14B 108.2 . . ? 
H14A C14 H14B 107.4 . . ? 
C14 C15 S2 110.6(5) . . ? 
C14 C15 H15A 109.5 . . ? 
S2 C15 H15A 109.5 . . ? 
C14 C15 H15B 109.5 . . ? 
S2 C15 H15B 109.5 . . ? 
H15A C15 H15B 108.1 . . ? 
N4 C16 N5 128.8(7) . . ? 
N4 C16 S2 118.1(5) . . ? 
N5 C16 S2 113.2(5) . . ? 
N5 C17 C18 123.7(7) . . ? 
N5 C17 H17 118.1 . . ? 
C18 C17 H17 118.1 . . ? 
C17 C18 C19 116.6(7) . . ? 
C17 C18 H18 121.7 . . ? 
C19 C18 H18 121.7 . . ? 
N4 C19 C18 121.2(6) . . ? 
N4 C19 C20 115.3(6) . . ? 
C18 C19 C20 123.6(7) . . ? 
C24 C20 C21 116.9(7) . . ? 
C24 C20 C19 120.1(7) . . ? 
C21 C20 C19 122.9(7) . . ? 
C22 C21 C20 121.0(7) . . ? 
C22 C21 H21 119.5 . . ? 
C20 C21 H21 119.5 . . ? 
C21 C22 C23 117.8(7) . . ? 
C21 C22 H22 121.1 . . ? 
C23 C22 H22 121.1 . . ? 
N6 C23 C22 122.7(7) . . ? 
N6 C23 H23 118.6 . . ? 
C22 C23 H23 118.6 . . ? 
N6 C24 C20 124.1(7) . . ? 
N6 C24 H24 117.9 . . ? 
C20 C24 H24 117.9 . . ? 
 
_diffrn_measured_fraction_theta_max    0.995 
_diffrn_reflns_theta_full              27.00 
_diffrn_measured_fraction_theta_full   0.995 
_refine_diff_density_max    1.390 
_refine_diff_density_min   -1.198 
_refine_diff_density_rms    0.141 

  
#===============================END
 
data_2 
 
_audit_creation_method            SHELXL-97 
_chemical_name_systematic 
; 
 ? 
; 
_chemical_name_common             ? 
_chemical_melting_point           ? 
_chemical_formula_moiety          
'C20 H16 N6 S2 Hg I2 ' 
_chemical_formula_sum 
 'C20 H16 Hg I2 N6 S2' 
_chemical_formula_weight          858.90 
 
loop_ 
 _atom_type_symbol 
 _atom_type_description 
 _atom_type_scat_dispersion_real 
 _atom_type_scat_dispersion_imag 
 _atom_type_scat_source 
 'C'  'C'   0.0033   0.0016 
 'International Tables Vol C Tables 4.2.6.8 and 6.1.1.4' 
 'H'  'H'   0.0000   0.0000 
 'International Tables Vol C Tables 4.2.6.8 and 6.1.1.4' 
 'N'  'N'   0.0061   0.0033 
 'International Tables Vol C Tables 4.2.6.8 and 6.1.1.4' 
 'S'  'S'   0.1246   0.1234 
 'International Tables Vol C Tables 4.2.6.8 and 6.1.1.4' 
 'I'  'I'  -0.4742   1.8119 
 'International Tables Vol C Tables 4.2.6.8 and 6.1.1.4' 
 'Hg'  'Hg'  -2.3894   9.2266 
 'International Tables Vol C Tables 4.2.6.8 and 6.1.1.4' 
 
_symmetry_cell_setting            monoclinic 
_symmetry_space_group_name_H-M    'C 2/c' 
_symmetry_space_group_name_Hall   '-C 2yc'
loop_ 
 _symmetry_equiv_pos_as_xyz 
 'x, y, z' 
 '-x, y, -z+1/2' 
 'x+1/2, y+1/2, z' 
 '-x+1/2, y+1/2, -z+1/2' 
 '-x, -y, -z' 
 'x, -y, z-1/2' 
 '-x+1/2, -y+1/2, -z' 
 'x+1/2, -y+1/2, z-1/2' 
 
_cell_length_a                    16.447(2) 
_cell_length_b                    6.8547(8) 
_cell_length_c                    22.978(3) 
_cell_angle_alpha                 90.00 
_cell_angle_beta                  103.066(2) 
_cell_angle_gamma                 90.00 
_cell_volume                      2523.5(5) 
_cell_formula_units_Z             4 
_cell_measurement_temperature     291(2) 
_cell_measurement_reflns_used     1188 
_cell_measurement_theta_min       2.547 
_cell_measurement_theta_max       21.941 
 
_exptl_crystal_description        'block'
_exptl_crystal_colour             'pale yellow' 
_exptl_crystal_size_max           0.20 
_exptl_crystal_size_mid           0.10 
_exptl_crystal_size_min           0.10 
_exptl_crystal_density_meas       ? 
_exptl_crystal_density_diffrn     2.261 
_exptl_crystal_density_method     'not measured' 
_exptl_crystal_F_000              1584 
_exptl_absorpt_coefficient_mu     8.731 
_exptl_absorpt_correction_type    multi-scan 
_exptl_absorpt_correction_T_min   0.3741 
_exptl_absorpt_correction_T_max   0.4555 
_exptl_absorpt_process_details    ?
 
_exptl_special_details 
; 

; 
 
_diffrn_ambient_temperature       291(2) 
_diffrn_radiation_wavelength      0.71073 
_diffrn_radiation_type            MoK\a 
_diffrn_radiation_source          'fine-focus sealed tube' 
_diffrn_radiation_monochromator   graphite 
_diffrn_measurement_device_type   'Bruker CCD area detector'
_diffrn_measurement_method        ? 
_diffrn_detector_area_resol_mean  ? 
_diffrn_standards_number          ? 
_diffrn_standards_interval_count  ? 
_diffrn_standards_interval_time   ? 
_diffrn_standards_decay_%         ? 
_diffrn_reflns_number             6531 
_diffrn_reflns_av_R_equivalents   0.0564 
_diffrn_reflns_av_sigmaI/netI     0.0831 
_diffrn_reflns_limit_h_min        -20 
_diffrn_reflns_limit_h_max        20 
_diffrn_reflns_limit_k_min        -6 
_diffrn_reflns_limit_k_max        8 
_diffrn_reflns_limit_l_min        -28 
_diffrn_reflns_limit_l_max        21 
_diffrn_reflns_theta_min          1.82 
_diffrn_reflns_theta_max          26.00 
_reflns_number_total              2477 
_reflns_number_gt                 1814 
_reflns_threshold_expression      >2sigma(I) 
 
_computing_data_collection      'SMART (Bruker, 2000)'
_computing_cell_refinement      'SMART (Bruker, 2000)'
_computing_data_reduction       'SAINT (Bruker, 2000)'
_computing_structure_solution   'SHELXTL (Bruker, 2000)'
_computing_structure_refinement 'SHELXTL (Bruker, 2000)'
_computing_molecular_graphics   'SHELXTL (Bruker, 2000)'
_computing_publication_material 'SHELXTL (Bruker, 2000)'
 
_refine_special_details 
; 
 Refinement of F^2^ against ALL reflections.  The weighted R-factor wR and 
 goodness of fit S are based on F^2^, conventional R-factors R are based 
 on F, with F set to zero for negative F^2^. The threshold expression of 
 F^2^ > 2sigma(F^2^) is used only for calculating R-factors(gt) etc. and is 
 not relevant to the choice of reflections for refinement.  R-factors based 
 on F^2^ are statistically about twice as large as those based on F, and R- 
 factors based on ALL data will be even larger. 
; 
 
_refine_ls_structure_factor_coef  Fsqd  
_refine_ls_matrix_type            full 
_refine_ls_weighting_scheme       calc  
_refine_ls_weighting_details 
 'calc w=1/[\s^2^(Fo^2^)+(0.0162P)^2^+0.0000P] where P=(Fo^2^+2Fc^2^)/3' 
_atom_sites_solution_primary      direct 
_atom_sites_solution_secondary    difmap 
_atom_sites_solution_hydrogens    geom 
_refine_ls_hydrogen_treatment     constr 
_refine_ls_extinction_method      none 
_refine_ls_extinction_coef        ? 
_refine_ls_number_reflns          2477 
_refine_ls_number_parameters      141 
_refine_ls_number_restraints      0 
_refine_ls_R_factor_all           0.0733 
_refine_ls_R_factor_gt            0.0483 
_refine_ls_wR_factor_ref          0.0732 
_refine_ls_wR_factor_gt           0.0666 
_refine_ls_goodness_of_fit_ref    0.899 
_refine_ls_restrained_S_all       0.899 
_refine_ls_shift/su_max           0.000 
_refine_ls_shift/su_mean          0.000 
 
loop_ 
 _atom_site_label 
 _atom_site_type_symbol 
 _atom_site_fract_x 
 _atom_site_fract_y 
 _atom_site_fract_z 
 _atom_site_U_iso_or_equiv 
 _atom_site_adp_type 
 _atom_site_occupancy 
 _atom_site_symmetry_multiplicity 
 _atom_site_calc_flag 
 _atom_site_refinement_flags 
 _atom_site_disorder_assembly 
 _atom_site_disorder_group 
Hg1 Hg 0.0000 0.09981(7) 0.2500 0.04812(17) Uani 1 2 d S . . 
I1 I 0.03796(4) -0.03690(10) 0.15224(3) 0.0719(2) Uani 1 1 d . . . 
N3 N 0.1020(4) 0.3477(9) 0.2857(3) 0.0508(19) Uani 1 1 d . . . 
C9 C 0.1304(5) 0.3664(11) 0.3440(4) 0.048(2) Uani 1 1 d . . . 
H9 H 0.1072 0.2882 0.3690 0.058 Uiso 1 1 calc R . . 
C7 C 0.1926(6) 0.6025(13) 0.2722(4) 0.067(3) Uani 1 1 d . . . 
H7 H 0.2109 0.6880 0.2464 0.080 Uiso 1 1 calc R . . 
C8 C 0.1326(6) 0.4657(13) 0.2504(4) 0.061(3) Uani 1 1 d . . . 
H8 H 0.1127 0.4554 0.2093 0.073 Uiso 1 1 calc R . . 
N1 N 0.1623(4) 0.4706(8) 0.4662(3) 0.0369(16) Uani 1 1 d . . . 
C5 C 0.1928(5) 0.4955(11) 0.3699(4) 0.037(2) Uani 1 1 d . . . 
C4 C 0.2221(5) 0.5022(10) 0.4359(4) 0.040(2) Uani 1 1 d . . . 
C1 C 0.1882(6) 0.4739(10) 0.5253(4) 0.042(2) Uani 1 1 d . . . 
C3 C 0.3045(5) 0.5349(10) 0.4645(4) 0.043(2) Uani 1 1 d . . . 
H3 H 0.3457 0.5562 0.4434 0.052 Uiso 1 1 calc R . . 
C6 C 0.2246(5) 0.6111(11) 0.3314(4) 0.054(2) Uani 1 1 d . . . 
H6 H 0.2685 0.6957 0.3464 0.065 Uiso 1 1 calc R . . 
S1 S 0.11508(15) 0.4447(3) 0.56976(10) 0.0563(6) Uani 1 1 d . . . 
N2 N 0.2652(5) 0.5047(9) 0.5575(3) 0.0485(19) Uani 1 1 d . . . 
C2 C 0.3221(6) 0.5341(10) 0.5260(4) 0.052(2) Uani 1 1 d . . . 
H2 H 0.3769 0.5554 0.5464 0.062 Uiso 1 1 calc R . . 
C10 C 0.0178(5) 0.4085(10) 0.5147(4) 0.053(2) Uani 1 1 d . . . 
H10A H 0.0276 0.3185 0.4844 0.063 Uiso 1 1 calc R . . 
H10B H -0.0226 0.3490 0.5341 0.063 Uiso 1 1 calc R . . 
 
loop_ 
 _atom_site_aniso_label 
 _atom_site_aniso_U_11 
 _atom_site_aniso_U_22 
 _atom_site_aniso_U_33 
 _atom_site_aniso_U_23 
 _atom_site_aniso_U_13 
 _atom_site_aniso_U_12 
Hg1 0.0503(3) 0.0592(3) 0.0338(3) 0.000 0.0073(2) 0.000 
I1 0.0658(5) 0.0993(6) 0.0498(5) -0.0206(3) 0.0111(4) 0.0192(4) 
N3 0.056(5) 0.062(5) 0.034(4) 0.002(4) 0.011(4) -0.009(4) 
C9 0.064(6) 0.044(6) 0.044(6) 0.014(4) 0.028(5) 0.000(4) 
C7 0.071(7) 0.077(7) 0.053(7) 0.014(6) 0.015(6) -0.028(6) 
C8 0.071(7) 0.075(7) 0.032(6) 0.012(5) 0.006(5) 0.001(5) 
N1 0.036(4) 0.028(4) 0.048(5) 0.001(3) 0.010(4) -0.003(3) 
C5 0.035(5) 0.037(5) 0.043(5) 0.000(4) 0.015(4) 0.001(4) 
C4 0.050(6) 0.027(5) 0.045(6) -0.002(4) 0.012(5) -0.001(4) 
C1 0.054(6) 0.023(4) 0.049(6) 0.003(4) 0.011(5) 0.004(4) 
C3 0.048(6) 0.032(5) 0.051(6) 0.003(4) 0.013(5) 0.000(4) 
C6 0.050(6) 0.060(6) 0.052(6) 0.004(5) 0.012(5) -0.020(5) 
S1 0.0662(17) 0.0637(16) 0.0425(14) 0.0043(11) 0.0198(13) -0.0044(12) 
N2 0.052(5) 0.041(4) 0.045(5) 0.007(3) -0.005(4) 0.003(4) 
C2 0.048(6) 0.041(5) 0.060(7) 0.003(4) 0.001(5) -0.001(4) 
C10 0.066(6) 0.053(6) 0.046(6) 0.000(4) 0.025(5) -0.006(5) 
 
_geom_special_details 
; 
 All esds (except the esd in the dihedral angle between two l.s. planes) 
 are estimated using the full covariance matrix.  The cell esds are taken 
 into account individually in the estimation of esds in distances, angles 
 and torsion angles; correlations between esds in cell parameters are only 
 used when they are defined by crystal symmetry.  An approximate (isotropic) 
 treatment of cell esds is used for estimating esds involving l.s. planes. 
; 
 
loop_ 
 _geom_bond_atom_site_label_1 
 _geom_bond_atom_site_label_2 
 _geom_bond_distance 
 _geom_bond_site_symmetry_2 
 _geom_bond_publ_flag 
Hg1 N3 2.398(6) . ? 
Hg1 N3 2.398(6) 2 ? 
Hg1 I1 2.6358(7) . ? 
Hg1 I1 2.6358(7) 2 ? 
N3 C9 1.320(9) . ? 
N3 C8 1.323(9) . ? 
C9 C5 1.383(10) . ? 
C9 H9 0.9300 . ? 
C7 C6 1.345(11) . ? 
C7 C8 1.371(11) . ? 
C7 H7 0.9300 . ? 
C8 H8 0.9300 . ? 
N1 C1 1.328(9) . ? 
N1 C4 1.344(9) . ? 
C5 C6 1.376(10) . ? 
C5 C4 1.485(10) . ? 
C4 C3 1.385(10) . ? 
C1 N2 1.331(9) . ? 
C1 S1 1.756(8) . ? 
C3 C2 1.376(11) . ? 
C3 H3 0.9300 . ? 
C6 H6 0.9300 . ? 
S1 C10 1.818(9) . ? 
N2 C2 1.322(10) . ? 
C2 H2 0.9300 . ? 
C10 C10 1.482(13) 5_566 ? 
C10 H10A 0.9700 . ? 
C10 H10B 0.9700 . ? 
 
loop_ 
 _geom_angle_atom_site_label_1 
 _geom_angle_atom_site_label_2 
 _geom_angle_atom_site_label_3 
 _geom_angle 
 _geom_angle_site_symmetry_1 
 _geom_angle_site_symmetry_3 
 _geom_angle_publ_flag 
N3 Hg1 N3 89.8(3) . 2 ? 
N3 Hg1 I1 105.17(16) . . ? 
N3 Hg1 I1 104.02(16) 2 . ? 
N3 Hg1 I1 104.02(16) . 2 ? 
N3 Hg1 I1 105.17(16) 2 2 ? 
I1 Hg1 I1 138.35(4) . 2 ? 
C9 N3 C8 117.7(7) . . ? 
C9 N3 Hg1 118.4(5) . . ? 
C8 N3 Hg1 123.9(6) . . ? 
N3 C9 C5 123.9(7) . . ? 
N3 C9 H9 118.1 . . ? 
C5 C9 H9 118.1 . . ? 
C6 C7 C8 118.9(8) . . ? 
C6 C7 H7 120.6 . . ? 
C8 C7 H7 120.6 . . ? 
N3 C8 C7 122.5(9) . . ? 
N3 C8 H8 118.7 . . ? 
C7 C8 H8 118.7 . . ? 
C1 N1 C4 115.1(7) . . ? 
C6 C5 C9 116.3(8) . . ? 
C6 C5 C4 123.8(7) . . ? 
C9 C5 C4 119.9(7) . . ? 
N1 C4 C3 122.2(8) . . ? 
N1 C4 C5 114.7(7) . . ? 
C3 C4 C5 123.1(8) . . ? 
N1 C1 N2 128.0(8) . . ? 
N1 C1 S1 119.3(7) . . ? 
N2 C1 S1 112.7(7) . . ? 
C2 C3 C4 116.2(8) . . ? 
C2 C3 H3 121.9 . . ? 
C4 C3 H3 121.9 . . ? 
C7 C6 C5 120.5(8) . . ? 
C7 C6 H6 119.8 . . ? 
C5 C6 H6 119.8 . . ? 
C1 S1 C10 102.8(4) . . ? 
C2 N2 C1 114.9(8) . . ? 
N2 C2 C3 123.6(9) . . ? 
N2 C2 H2 118.2 . . ? 
C3 C2 H2 118.2 . . ? 
C10 C10 S1 113.4(8) 5_566 . ? 
C10 C10 H10A 108.9 5_566 . ? 
S1 C10 H10A 108.9 . . ? 
C10 C10 H10B 108.9 5_566 . ? 
S1 C10 H10B 108.9 . . ? 
H10A C10 H10B 107.7 . . ? 
 
_diffrn_measured_fraction_theta_max    0.998 
_diffrn_reflns_theta_full              26.00 
_diffrn_measured_fraction_theta_full   0.998 
_refine_diff_density_max    1.296 
_refine_diff_density_min   -0.830 
_refine_diff_density_rms    0.138 
 
#===============================END
 
 
data_L 
 
_audit_creation_method            SHELXL-97 
_chemical_name_systematic 
; 
 ? 
; 
_chemical_name_common             ? 
_chemical_melting_point           ? 
_chemical_formula_moiety          
'C20 H16 N6 S2' 
_chemical_formula_sum 
 'C20 H16 N6 S2' 
_chemical_formula_weight          404.5 
 
loop_ 
 _atom_type_symbol 
 _atom_type_description 
 _atom_type_scat_dispersion_real 
 _atom_type_scat_dispersion_imag 
 _atom_type_scat_source 
 'C'  'C'   0.0033   0.0016 
 'International Tables Vol C Tables 4.2.6.8 and 6.1.1.4' 
 'H'  'H'   0.0000   0.0000 
 'International Tables Vol C Tables 4.2.6.8 and 6.1.1.4' 
 'N'  'N'   0.0061   0.0033 
 'International Tables Vol C Tables 4.2.6.8 and 6.1.1.4' 
 'S'  'S'   0.1246   0.1234 
 'International Tables Vol C Tables 4.2.6.8 and 6.1.1.4' 
 
_symmetry_cell_setting             Monoclinic
_symmetry_space_group_name_H-M    'C 2/c' 
_symmetry_space_group_name_Hall   '-C 2yc'
 
loop_ 
 _symmetry_equiv_pos_as_xyz 
 'x, y, z' 
 '-x, y, -z+1/2' 
 'x+1/2, y+1/2, z' 
 '-x+1/2, y+1/2, -z+1/2' 
 '-x, -y, -z' 
 'x, -y, z-1/2' 
 '-x+1/2, -y+1/2, -z' 
 'x+1/2, -y+1/2, z-1/2' 
 
_cell_length_a                    32.592(8) 
_cell_length_b                    4.9985(12) 
_cell_length_c                    12.108(3) 
_cell_angle_alpha                 90.00 
_cell_angle_beta                  104.238(5) 
_cell_angle_gamma                 90.00 
_cell_volume                      1911.9(8) 
_cell_formula_units_Z             4 
_cell_measurement_temperature     291(2) 
_cell_measurement_reflns_used     817 
_cell_measurement_theta_min       2.257 
_cell_measurement_theta_max       22.4125 
 
_exptl_crystal_description        block 
_exptl_crystal_colour             'pale yellow'
_exptl_crystal_size_max           0.4
_exptl_crystal_size_mid           0.4 
_exptl_crystal_size_min           0.2 
_exptl_crystal_density_meas       ? 
_exptl_crystal_density_diffrn     1.405 
_exptl_crystal_density_method     'not measured' 
_exptl_crystal_F_000              840 
_exptl_absorpt_coefficient_mu     0.297 
_exptl_absorpt_correction_type    multi-scan 
_exptl_absorpt_correction_T_min   0.884 
_exptl_absorpt_correction_T_max   0.932  
_exptl_absorpt_process_details    ?
 
_exptl_special_details 
; 
 ? 
; 
 
_diffrn_ambient_temperature       291(2) 
_diffrn_radiation_wavelength      0.71073 
_diffrn_radiation_type            MoK\a 
_diffrn_radiation_source          'fine-focus sealed tube' 
_diffrn_radiation_monochromator   graphite 
_diffrn_measurement_device_type   'Bruker CCD area detector' 
_diffrn_measurement_method        ? 
_diffrn_detector_area_resol_mean  ? 
_diffrn_standards_number          ? 
_diffrn_standards_interval_count  ? 
_diffrn_standards_interval_time   ? 
_diffrn_standards_decay_%         ? 
_diffrn_reflns_number             4798 
_diffrn_reflns_av_R_equivalents   0.0580 
_diffrn_reflns_av_sigmaI/netI     0.0709 
_diffrn_reflns_limit_h_min        -40 
_diffrn_reflns_limit_h_max        36 
_diffrn_reflns_limit_k_min        -5 
_diffrn_reflns_limit_k_max        6 
_diffrn_reflns_limit_l_min        -12 
_diffrn_reflns_limit_l_max        14 
_diffrn_reflns_theta_min          2.58 
_diffrn_reflns_theta_max          26.00 
_reflns_number_total              1870 
_reflns_number_gt                 1284 
_reflns_threshold_expression      >2sigma(I) 
 
_computing_data_collection        'SMART (Bruker, 2000)'
_computing_cell_refinement        'SMART (Bruker, 2000)' 
_computing_data_reduction         'SAINT (Bruker, 2000)' 
_computing_structure_solution     'SHELXTL (Bruker, 2000)' 
_computing_structure_refinement   'SHELXTL (Bruker, 2000)' 
_computing_molecular_graphics     'SHELXTL (Bruker, 2000)'
_computing_publication_material   'SHELXTL (Bruker, 2000)'
 
_refine_special_details 
; 
 Refinement of F^2^ against ALL reflections.  The weighted R-factor wR and 
 goodness of fit S are based on F^2^, conventional R-factors R are based 
 on F, with F set to zero for negative F^2^. The threshold expression of 
 F^2^ > 2sigma(F^2^) is used only for calculating R-factors(gt) etc. and is 
 not relevant to the choice of reflections for refinement.  R-factors based 
 on F^2^ are statistically about twice as large as those based on F, and R- 
 factors based on ALL data will be even larger. 
; 
 
_refine_ls_structure_factor_coef  Fsqd  
_refine_ls_matrix_type            full 
_refine_ls_weighting_scheme       calc  
_refine_ls_weighting_details 
 'calc w=1/[\s^2^(Fo^2^)+(0.0347P)^2^+0.0000P] where P=(Fo^2^+2Fc^2^)/3' 
_atom_sites_solution_primary      direct 
_atom_sites_solution_secondary    difmap 
_atom_sites_solution_hydrogens    geom 
_refine_ls_hydrogen_treatment     constr 
_refine_ls_extinction_method      none 
_refine_ls_extinction_coef        ? 
_refine_ls_number_reflns          1870 
_refine_ls_number_parameters      127 
_refine_ls_number_restraints      0 
_refine_ls_R_factor_all           0.0758 
_refine_ls_R_factor_gt            0.0474 
_refine_ls_wR_factor_ref          0.1005 
_refine_ls_wR_factor_gt           0.0927 
_refine_ls_goodness_of_fit_ref    0.918 
_refine_ls_restrained_S_all       0.918 
_refine_ls_shift/su_max           0.001 
_refine_ls_shift/su_mean          0.000 
 
loop_ 
 _atom_site_label 
 _atom_site_type_symbol 
 _atom_site_fract_x 
 _atom_site_fract_y 
 _atom_site_fract_z 
 _atom_site_U_iso_or_equiv 
 _atom_site_adp_type 
 _atom_site_occupancy 
 _atom_site_symmetry_multiplicity 
 _atom_site_calc_flag 
 _atom_site_refinement_flags 
 _atom_site_disorder_assembly 
 _atom_site_disorder_group 
S1 S 0.44387(2) 0.14643(14) 1.05176(6) 0.0523(2) Uani 1 1 d . . . 
N1 N 0.39133(5) 0.4954(4) 0.93905(15) 0.0383(5) Uani 1 1 d . . . 
N2 N 0.43055(6) 0.2514(4) 0.82998(17) 0.0466(5) Uani 1 1 d . . . 
N3 N 0.30447(7) 1.0532(5) 0.98560(17) 0.0636(7) Uani 1 1 d . . . 
C1 C 0.41967(7) 0.3153(5) 0.92556(19) 0.0385(6) Uani 1 1 d . . . 
C2 C 0.41037(8) 0.3911(5) 0.7391(2) 0.0506(7) Uani 1 1 d . . . 
H2 H 0.4167 0.3555 0.6697 0.061 Uiso 1 1 calc R . . 
C3 C 0.38101(7) 0.5833(5) 0.74231(19) 0.0463(6) Uani 1 1 d . . . 
H3 H 0.3676 0.6773 0.6771 0.056 Uiso 1 1 calc R . . 
C4 C 0.37182(7) 0.6337(5) 0.84618(19) 0.0369(6) Uani 1 1 d . . . 
C5 C 0.34069(6) 0.8357(5) 0.86076(18) 0.0365(6) Uani 1 1 d . . . 
C6 C 0.31924(7) 0.9956(5) 0.77313(19) 0.0436(6) Uani 1 1 d . . . 
H6 H 0.3240 0.9780 0.7009 0.052 Uiso 1 1 calc R . . 
C7 C 0.29086(7) 1.1806(5) 0.7922(2) 0.0492(7) Uani 1 1 d . . . 
H7 H 0.2760 1.2881 0.7331 0.059 Uiso 1 1 calc R . . 
C8 C 0.28475(7) 1.2051(6) 0.8987(2) 0.0524(7) Uani 1 1 d . . . 
H8 H 0.2659 1.3342 0.9114 0.063 Uiso 1 1 calc R . . 
C9 C 0.33154(8) 0.8748(6) 0.9649(2) 0.0564(8) Uani 1 1 d . . . 
H9 H 0.3455 0.7674 1.0252 0.068 Uiso 1 1 calc R . . 
C10 C 0.48030(6) -0.0716(5) 1.0061(2) 0.0489(7) Uani 1 1 d . . . 
H10A H 0.4883 -0.2157 1.0608 0.059 Uiso 1 1 calc R . . 
H10B H 0.4663 -0.1505 0.9334 0.059 Uiso 1 1 calc R . . 
 
loop_ 
 _atom_site_aniso_label 
 _atom_site_aniso_U_11 
 _atom_site_aniso_U_22 
 _atom_site_aniso_U_33 
 _atom_site_aniso_U_23 
 _atom_site_aniso_U_13 
 _atom_site_aniso_U_12 
S1 0.0508(4) 0.0576(5) 0.0492(4) 0.0116(3) 0.0141(3) 0.0129(3) 
N1 0.0377(10) 0.0417(13) 0.0354(11) 0.0012(9) 0.0086(9) 0.0014(10) 
N2 0.0515(12) 0.0493(14) 0.0422(13) -0.0025(10) 0.0178(10) 0.0043(11) 
N3 0.0766(15) 0.0766(18) 0.0409(13) 0.0031(12) 0.0209(12) 0.0325(14) 
C1 0.0367(12) 0.0382(15) 0.0398(14) 0.0019(11) 0.0081(11) -0.0033(11) 
C2 0.0610(16) 0.0561(18) 0.0386(15) -0.0045(13) 0.0195(13) 0.0023(15) 
C3 0.0540(15) 0.0534(17) 0.0324(14) 0.0046(12) 0.0125(11) 0.0074(13) 
C4 0.0373(12) 0.0389(14) 0.0342(13) -0.0005(11) 0.0080(10) -0.0042(12) 
C5 0.0374(12) 0.0406(15) 0.0301(13) -0.0005(11) 0.0056(10) -0.0023(11) 
C6 0.0470(14) 0.0530(17) 0.0318(14) 0.0032(12) 0.0118(11) 0.0006(13) 
C7 0.0477(14) 0.0539(18) 0.0431(16) 0.0081(13) 0.0055(12) 0.0059(13) 
C8 0.0516(15) 0.0523(18) 0.0534(18) -0.0016(14) 0.0131(13) 0.0126(13) 
C9 0.0656(17) 0.070(2) 0.0325(14) 0.0090(13) 0.0104(12) 0.0250(16) 
C10 0.0426(13) 0.0394(16) 0.0631(17) 0.0063(13) 0.0101(13) 0.0063(12) 
 
_geom_special_details 
; 
 All esds (except the esd in the dihedral angle between two l.s. planes) 
 are estimated using the full covariance matrix.  The cell esds are taken 
 into account individually in the estimation of esds in distances, angles 
 and torsion angles; correlations between esds in cell parameters are only 
 used when they are defined by crystal symmetry.  An approximate (isotropic) 
 treatment of cell esds is used for estimating esds involving l.s. planes. 
; 
 
loop_ 
 _geom_bond_atom_site_label_1 
 _geom_bond_atom_site_label_2 
 _geom_bond_distance 
 _geom_bond_site_symmetry_2 
 _geom_bond_publ_flag 
S1 C1 1.754(2) . ? 
S1 C10 1.796(2) . ? 
N1 C1 1.329(3) . ? 
N1 C4 1.340(3) . ? 
N2 C1 1.330(3) . ? 
N2 C2 1.332(3) . ? 
N3 C9 1.321(3) . ? 
N3 C8 1.328(3) . ? 
C2 C3 1.364(3) . ? 
C2 H2 0.9300 . ? 
C3 C4 1.386(3) . ? 
C3 H3 0.9300 . ? 
C4 C5 1.473(3) . ? 
C5 C6 1.374(3) . ? 
C5 C9 1.379(3) . ? 
C6 C7 1.367(3) . ? 
C6 H6 0.9300 . ? 
C7 C8 1.359(3) . ? 
C7 H7 0.9300 . ? 
C8 H8 0.9300 . ? 
C9 H9 0.9300 . ? 
C10 C10 1.509(4) 5_657 ? 
C10 H10A 0.9700 . ? 
C10 H10B 0.9700 . ? 
 
loop_ 
 _geom_angle_atom_site_label_1 
 _geom_angle_atom_site_label_2 
 _geom_angle_atom_site_label_3 
 _geom_angle 
 _geom_angle_site_symmetry_1 
 _geom_angle_site_symmetry_3 
 _geom_angle_publ_flag 
C1 S1 C10 102.31(12) . . ? 
C1 N1 C4 116.57(19) . . ? 
C1 N2 C2 114.2(2) . . ? 
C9 N3 C8 116.8(2) . . ? 
N1 C1 N2 127.7(2) . . ? 
N1 C1 S1 113.35(17) . . ? 
N2 C1 S1 118.92(18) . . ? 
N2 C2 C3 123.6(2) . . ? 
N2 C2 H2 118.2 . . ? 
C3 C2 H2 118.2 . . ? 
C2 C3 C4 117.6(2) . . ? 
C2 C3 H3 121.2 . . ? 
C4 C3 H3 121.2 . . ? 
N1 C4 C3 120.3(2) . . ? 
N1 C4 C5 116.87(19) . . ? 
C3 C4 C5 122.9(2) . . ? 
C6 C5 C9 116.1(2) . . ? 
C6 C5 C4 122.7(2) . . ? 
C9 C5 C4 121.1(2) . . ? 
C7 C6 C5 120.0(2) . . ? 
C7 C6 H6 120.0 . . ? 
C5 C6 H6 120.0 . . ? 
C8 C7 C6 119.0(2) . . ? 
C8 C7 H7 120.5 . . ? 
C6 C7 H7 120.5 . . ? 
N3 C8 C7 123.1(2) . . ? 
N3 C8 H8 118.5 . . ? 
C7 C8 H8 118.5 . . ? 
N3 C9 C5 125.0(2) . . ? 
N3 C9 H9 117.5 . . ? 
C5 C9 H9 117.5 . . ? 
C10 C10 S1 112.6(2) 5_657 . ? 
C10 C10 H10A 109.1 5_657 . ? 
S1 C10 H10A 109.1 . . ? 
C10 C10 H10B 109.1 5_657 . ? 
S1 C10 H10B 109.1 . . ? 
H10A C10 H10B 107.8 . . ? 
 
_diffrn_measured_fraction_theta_max    0.994 
_diffrn_reflns_theta_full              26.00 
_diffrn_measured_fraction_theta_full   0.994 
_refine_diff_density_max    0.214 
_refine_diff_density_min   -0.215 
_refine_diff_density_rms    0.048 

 
#===============================END
